# Supplementary material for: The PLUTO plastidial nucleobase transporter also transports the thiamin precursor hydroxymethylpyrimidine
Source: Oxford University Press journal article supplement (doi:10.1042/bsr20180048), 2018-03-06
Supplement: bsr20180048_supp1.pdf [file bsr20180048_supp1.pdf]

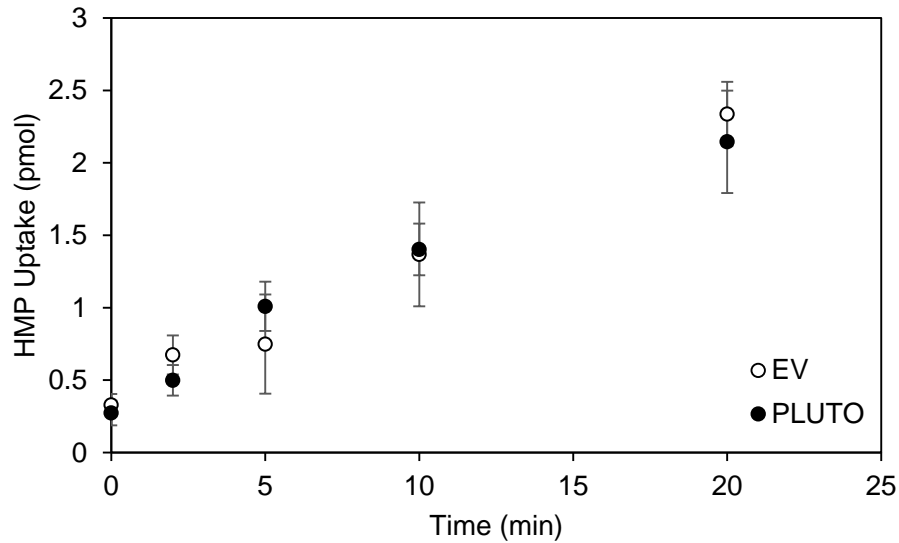

**Supplementary Fig. S1.** IPTG-induced *E. coli* cells expressing PLUTO show no increase in HMP uptake when supplied with 12.5 nM [ $^3\text{H}$ ]HMP relative to an empty vector control (EV). *E. coli* expressing PLUTO (black circles) or the empty vector control (white circles) were grown as described [7] and resuspended to an  $\text{OD}_{600}$  of 10 in M9-glucose medium. Assays were initiated by combining 500  $\mu\text{L}$  of cell suspension and 500  $\mu\text{L}$  of M9-glucose containing 25 nM [ $^3\text{H}$ ]HMP. Aliquots (50  $\mu\text{L}$ ) were taken, the cells separated by filtration, washed, and [ $^3\text{H}$ ]HMP uptake measured by liquid scintillation counting. Data are means and SEM for three independent replicates.

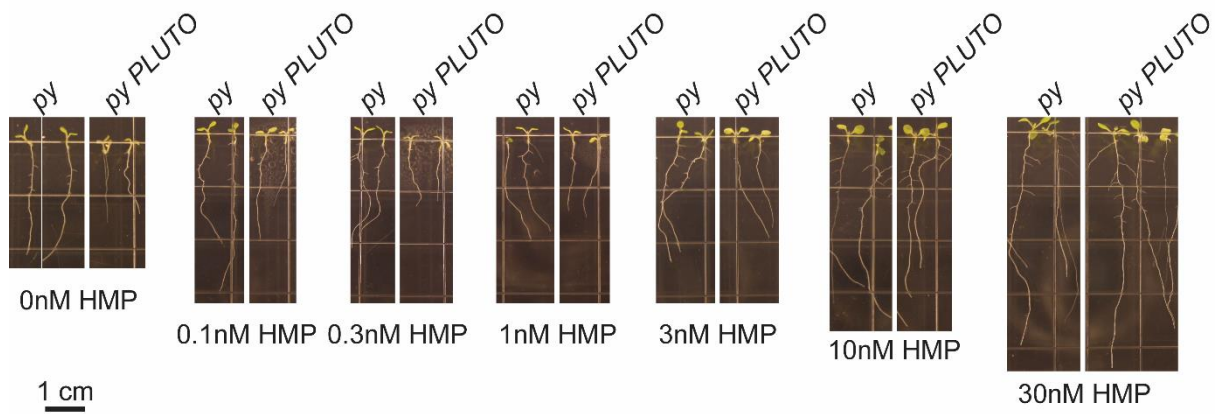

**Supplementary Fig. S2.** Representative *py* and *py PLUTO* *Arabidopsis* mutants grown with or without exogenous HMP. Plants were grown for 6 days on  $\frac{1}{2}$  MS medium with sucrose.

**Supplementary Table S1.** GeneMANIA query and co-expressed genes

|             | <b>Gene name</b>   | <b>Locus tag</b> | <b>Description</b>                                            |
|-------------|--------------------|------------------|---------------------------------------------------------------|
| Query genes | NCS1               | <i>At5g03555</i> | Nucleobase cation symporter 1                                 |
|             | THIC               | <i>At2g29630</i> | HMP-P synthase                                                |
|             | TH1                | <i>At1g22940</i> | HMP-P/HMP kinase; Thiamin-phosphate pyrophosphorylase         |
|             | THI1               | <i>At5g54770</i> | Thiazole synthase                                             |
|             | At1g02880          | <i>At1g02880</i> | Thiamin pyrophosphokinase                                     |
|             | At2g44750          | <i>At2g44750</i> | Thiamin pyrophosphokinase                                     |
|             | THIM               | <i>At3g24030</i> | HET kinase                                                    |
|             | TNEA_C             | <i>At5g32470</i> | Thiamin monophosphate hydrolase                               |
|             | TENA_E             | <i>At3g16990</i> | Thiaminase                                                    |
|             | NUDT20             | <i>At5g19460</i> | Nudix hydrolase 20, associated with thiamin pyrophosphokinase |
|             | NUDT24             | <i>At5g19470</i> | Nudix hydrolase 24, associated with thiamin pyrophosphokinase |
|             | COG0212            | <i>At1g76730</i> | 5-Formyltetrahydrofolate cyclo-ligase-like protein            |
|             | At5g48970          | <i>At5g48970</i> | Mitochondrial thiamine diphosphate transporter TPC1           |
|             | At3g21390          | <i>At3g21390</i> | Mitochondrial thiamine diphosphate transporter TPC1           |
|             | Co-expressed genes | PHS2             | <i>At3g46970</i>                                              |
| TRY         |                    | <i>At5g53200</i> | Transcription factor TRY                                      |
| At1g64430   |                    | <i>At1g64430</i> | Pentatricopeptide repeat (PPR) superfamily protein            |
| At4g24700   |                    | <i>At4g24700</i> | unknown protein                                               |
| At5g17570   |                    | <i>At5g17570</i> | TatD related DNase                                            |
| GCN2        |                    | <i>At3g59410</i> | Probable serine/threonine-protein kinase GCN2                 |
| At4g00490   |                    | <i>At4g00490</i> | Beta-amylase 2                                                |
| SPA4        |                    | <i>At1g53090</i> | Protein SPA1-RELATED 4                                        |
| AHL         |                    | <i>At5g54390</i> | PAP-specific phosphatase HAL2-like                            |
| At4g09620   |                    | <i>At4g09620</i> | Mitochondrial transcription termination factor family protein |
| RPP13       |                    | <i>At3g46530</i> | Disease resistance protein RPP13                              |
| At1g78995   |                    | <i>At1g78995</i> | unknown protein                                               |
| At5g02830   |                    | <i>At5g02830</i> | Pentatricopeptide repeat-containing protein                   |
| T2E22.34    |                    | <i>At3g12320</i> | unknown protein                                               |
| LCAT1       |                    | <i>At1g27480</i> | Lecithin-cholesterol acyltransferase-like 1                   |
| SBE2.1      |                    | <i>At2g36390</i> | 1,4-Alpha-glucan-branching enzyme 2-1                         |
| At5g40060   |                    | <i>At5g40060</i> | Disease resistance protein (NBS-LRR class) family             |
| MT2A        |                    | <i>At3g09390</i> | Metallothionein-like protein 2A                               |
| EPF1        |                    | <i>At2g20875</i> | Protein EPIDERMAL PATTERNING FACTOR 1                         |
| At5g62130   |                    | <i>At5g62130</i> | Per1-like family protein                                      |
